# Supplementary material for: Genomic Landscape of Young-Onset Bladder Cancer and Its Prognostic Implications on Adult Bladder Cancer
Source: MDPI journal article supplement (doi:10.3390/cancers12020307), 2020-01-28
Supplement: s1 [file s1]

## Supplementary Material

### Contents:

**Supplementary Figure S1.** Results of Sanger Sequencing at the *FGFR3* Fusion Breakpoint

**Supplementary Figure S2.** Gene Expression Before and After the *FGFR3* Fusion Breakpoint

**Supplementary Figure S3.** Detailed Nucleotide and Amino Acid Changes of *HRAS* Deletion

**Supplementary Figure S4.** CNAs of Young-Onset Bladder Cancer (YBC)

**Supplementary Figure S5.** PCA Plots of YBC and the UROMOL Data

**Supplementary Figure S6.** Overall Recurrence-Free Survival Rates of YBC and Adult Bladder Cancer (ABC)

**Supplementary Figure S7.** Progression-Free Survival Rates of YBC and ABC Subdivided by Grade and Stage

**Supplementary Figure S8.** MAPK/ERK and PI3K/AKT Pathway Activity in YBC and the UROMOL Data

**Supplementary Table S1.** Clinicopathological Characters of the Cases. Supplementary Table S1 is supplied as a separate data sheet.

**Supplementary Table S2.** *HRAS* Mutation Frequencies in YBC, Adult NMIBC (UROMOL), and Adult MIBC (TCGA)

**Supplementary Table S3.** *HRAS* Mutations in Adult NMIBC (UROMOL)

**Supplementary Table S4.** *HRAS* Mutations in Adult MIBC (TCGA)

**Supplementary Table S5.** *HRAS* Exon 5 Mutations in Other TCGA Solid Tumors

**Supplementary Table S6.** *FGFR3* Fusions in Adult NMIBC (UROMOL)

**Supplementary Table S7.** PCR primer Sequences Used

**Supplementary Table S8.** Adult Bladder Cancer Studies Used for Comparison with Young-Onset Bladder Cancer (YBC)

**Supplementary Table S2.** *HRAS* Mutation Frequencies in YBC, Adult NMIBC (UROMOL), and Adult MIBC (TCGA).

|                             | YBC (n = 21) |      | NMIBC (n = 460) |     | MIBC (n = 408) |     |
|-----------------------------|--------------|------|-----------------|-----|----------------|-----|
|                             | n            | %    | n               | %   | n              | %   |
| G12/G13/Q61 mutation        | 6            | 28.6 | 23              | 4.8 | 13             | 3.2 |
| Exon 5 small indel          | 4 (4) *      | 19.0 | 5 (3)*          | 1.1 | 4 (3) *        | 1   |
| Exon 5 splice site mutation | 0            | 0    | N/A             | N/A | 3 (3) *        | 0.7 |
| Exon 5 large deletion       | 4            | 19.0 | 0               | 0   | 0              | 0   |
| Total                       | 10           | 47.6 | 25              | 5.4 | 14             | 3.4 |

\* The number of samples with concurrent G12/G13/Q61 and exon 5 mutations.

**Supplementary Table S3.** *HRAS* Mutations in Adult NMIBC (UROMOL).

| ID    | stage | chromosome | position | REF          | ALT | <i>HRAS</i> mutation |
|-------|-------|------------|----------|--------------|-----|----------------------|
| U0046 | T1    | 11         | 534286   | C            | G   | G13R                 |
| U0060 | Ta    | 11         | 533874   | T            | C   | Q61R                 |
| U0094 | Ta    | 11         | 534288   | C            | A   | G12V                 |
| U0149 | Ta    | 11         | 533301   | TGGGTCCCCGGG | T   | exon 5 indels        |
| U0204 | Ta    | 11         | 533874   | T            | C   | Q61R                 |
| U0214 | T1    | 11         | 534286   | C            | G   | G13R                 |
| U0219 | Ta    | 11         | 533874   | T            | C   | Q61R                 |
| U0334 | T1    | 11         | 534288   | C            | T   | G12D                 |
| U0334 | T1    | 11         | 534285   | C            | A   | G13V                 |
| U0350 | Ta    | 11         | 533874   | T            | C   | Q61R                 |
| U0461 | Ta    | 11         | 534285   | C            | A   | G13V                 |
| U0496 | Ta    | 11         | 533301   | TGGGTCCCCGGG | T   | exon 5 indels        |
| U0496 | Ta    | 11         | 533874   | T            | C   | Q61R                 |
| U0573 | T1    | 11         | 533311   | GGGGTCCCAGA  | G   | exon 5 indels        |
| U0573 | T1    | 11         | 533874   | T            | A   | Q61L                 |
| U0590 | Ta    | 11         | 533875   | G            | T   | Q61K                 |
| U0642 | Ta    | 11         | 534286   | C            | G   | G13R                 |
| U0670 | T1    | 11         | 533874   | T            | C   | Q61R                 |
| U0847 | Ta    | 11         | 533874   | T            | C   | Q61R                 |
| U0915 | Ta    | 11         | 534286   | C            | G   | G13R                 |
| U0973 | Ta    | 11         | 533301   | TGGGTCCCCGGG | T   | exon 5 indels        |
| U1031 | Ta    | 11         | 533874   | T            | C   | Q61R                 |
| U1050 | Ta    | 11         | 533874   | T            | C   | Q61R                 |
| U1150 | Ta    | 11         | 533357   | C            | CGC | exon 5 indels        |
| U1150 | Ta    | 11         | 533874   | T            | A   | Q61L                 |
| U1233 | T1    | 11         | 534286   | C            | G   | G13R                 |
| U1270 | Ta    | 11         | 533874   | T            | C   | Q61R                 |
| U1374 | T1    | 11         | 533874   | T            | A   | Q61L                 |
| U1413 | Ta    | 11         | 533874   | T            | C   | Q61R                 |

**Supplementary Table S4.** *HRAS* Mutations in Adult MIBC (TCGA).

| chromosome | position | REF                                               | ALT | <i>HRAS</i> mutation        |
|------------|----------|---------------------------------------------------|-----|-----------------------------|
| 11         | 534285   | C                                                 | T   | G13D                        |
| 11         | 533344   | GCCAGAGCGGCTGCCCTGTGTCAAGGGAGAGGGTCAGT<br>GAGT    | G   | exon 5 indels               |
| 11         | 534288   | C                                                 | T   | G12D                        |
| 11         | 533276   | C                                                 | G   | exon 5 splice site mutation |
| 11         | 533874   | T                                                 | A   | Q61L                        |
| 11         | 533308   | CG                                                | C   | exon 5 indels               |
| 11         | 534285   | C                                                 | A   | G13V                        |
| 11         | 533276   | C                                                 | A   | exon 5 splice site mutation |
| 11         | 534289   | C                                                 | T   | G12S                        |
| 11         | 533305   | TCCCGGGGGGTCCCAGAGGGTCCCGGAGCTGGAGCTAG<br>AGCCAGA | TG  | exon 5 indels               |
| 11         | 534286   | C                                                 | G   | G13R                        |
| 11         | 533875   | G                                                 | T   | Q61K                        |
| 11         | 533276   | C                                                 | T   | exon 5 splice site mutation |
| 11         | 533311   | GGGGTCCCAGA                                       | G   | exon 5 indels               |
| 11         | 533874   | T                                                 | A   | Q61L                        |
| 11         | 534288   | C                                                 | T   | G12D                        |
| 11         | 534286   | C                                                 | G   | G13R                        |
| 11         | 533874   | T                                                 | A   | Q61L                        |
| 11         | 533875   | G                                                 | T   | Q61K                        |
| 11         | 533875   | G                                                 | T   | Q61K                        |

**Supplementary Table S5.** *HRAS* Exon 5 Mutations in Other TCGA Solid Tumors.

|                                     | Number (n) of<br>tested samples | <i>HRAS</i> exon 5<br>mutation (n) | Chromosome | Position | REF         | ALT | <i>HRAS</i><br>mutation |
|-------------------------------------|---------------------------------|------------------------------------|------------|----------|-------------|-----|-------------------------|
| Adrenocortical carcinoma            | 92                              | 0                                  |            |          |             |     |                         |
| Breast cancer                       | 1044                            | 0                                  |            |          |             |     |                         |
| Cervical cancer                     | 305                             | 0                                  |            |          |             |     |                         |
| Colorectal cancer                   | 590                             | 0                                  |            |          |             |     |                         |
| Endometrial cancer                  | 599                             | 0                                  |            |          |             |     |                         |
| Esophagogastric cancer              | 625                             | 0                                  |            |          |             |     |                         |
| Germ cell tumor                     | 150                             | 0                                  |            |          |             |     |                         |
| Glioma                              | 906                             | 0                                  |            |          |             |     |                         |
| Head and neck cancer                | 510                             | 0                                  |            |          |             |     |                         |
| Hepatobiliary cancer                | 471                             | 0                                  |            |          |             |     |                         |
| Lung cancer                         | 989                             | 1                                  | 11         | 533315   | TC          | T   | exon 5 indels           |
| Melanoma                            | 183                             | 0                                  |            |          |             |     |                         |
| Mesothelioma                        | 23                              | 0                                  |            |          |             |     |                         |
| Miscellaneous neuroepithelial tumor | 33                              | 0                                  |            |          |             |     |                         |
| Nerve sheath tumor                  | 9                               | 0                                  |            |          |             |     |                         |
| Non-Hodgkin lymphoma                | 43                              | 0                                  |            |          |             |     |                         |
| Ovarian cancer                      | 441                             | 0                                  |            |          |             |     |                         |
| Pancreatic cancer                   | 183                             | 0                                  |            |          |             |     |                         |
| Papillary thyroid cancer            | 496                             | 0                                  |            |          |             |     |                         |
| Pheochromocytoma                    | 147                             | 0                                  |            |          |             |     |                         |
| Prostate cancer                     | 498                             | 0                                  |            |          |             |     |                         |
| Renal cell carcinoma                | 693                             | 0                                  |            |          |             |     |                         |
| Soft tissue sarcoma                 | 246                             | 0                                  |            |          |             |     |                         |
| Thymic tumor                        | 121                             | 1                                  | 11         | 533301   | TGGGTCCCGGG | T   | exon 5 indels           |

**Supplementary Table S6.** *FGFR3* Fusions in Adult NMIBC (UROMOL).

| ID    | stage | Fusion              |
|-------|-------|---------------------|
| U0090 | T1    | <i>FGFR3--TACC3</i> |
| U0401 | T1    | <i>FGFR3--TACC3</i> |
| U0012 | Ta    | <i>FGFR3--TACC3</i> |
| U1276 | Ta    | <i>FGFR3--TACC3</i> |
| U1277 | Ta    | <i>FGFR3--TACC3</i> |
| U0430 | Ta    | <i>FGFR3--TACC3</i> |
| U0450 | Ta    | <i>FGFR3--TACC3</i> |
| U0777 | T1    | <i>FGFR3--TACC3</i> |
| U0130 | Ta    | <i>FGFR3--UBE2K</i> |
| U1002 | Ta    | <i>FGFR3--TACC3</i> |
| U0326 | Ta    | <i>FGFR3--TACC3</i> |

Supplementary Table S7. PCR Primer Sequences Used.

| ID  | mutation type         | primer1               | primer2                 |
|-----|-----------------------|-----------------------|-------------------------|
| T1  | <i>FGFR3</i> fusion   | GCAGGAGTACCTGGACCTGT  | ATTGGGTACTCACACGGGC     |
| T2  | <i>FGFR3</i> fusion   | ACTGGTCCCCAACAAATGTGA | CCATGACCGCCTTAGAATGT    |
| T3  | <i>FGFR3</i> fusion   | GACCGTGTCTTACCGTGAC   | TTCCCTCAGACCACACACAA    |
| T4  | <i>FGFR3</i> fusion   | CAGCAGGAGTACCTGGACCT  | GCAGAAACCAGCAAATCCAT    |
| T5  | <i>FGFR3</i> fusion   | CAGCAGGAGTACCTGGACCT  | CCACAACAATCATAACAGGGAGA |
| T6  | <i>FGFR3</i> fusion   | AGCAGGAGTACCTGGACCTG  | GGGGTCTCTGAAGCTCTCCT    |
| T8  | <i>HRAS</i> large del | GTGGGGAACAAGTGTGACCT  | ATCTCACGCACCAACGTGTA    |
| T9  | <i>HRAS</i> large del | GCTACGGCATCCCCTACAT   | GACACTCTGGGGACAAGAGG    |
| T10 | <i>HRAS</i> large del | GCTACGGCATCCCCTACAT   | GACACTCTGGGGACAAGAGG    |
| T12 | <i>HRAS</i> small del | CTCACTGACCCTCTCCCTTG  | AGCTCTCCCCAAGGACCTC     |
| T14 | <i>HRAS</i> small del | CTCACTGACCCTCTCCCTTG  | AGCTCTCCCCAAGGACCTC     |
| T15 | <i>HRAS</i> small del | CTCACTGACCCTCTCCCTTG  | AGCTCTCCCCAAGGACCTC     |

**Supplementary Table S8.** Adult Bladder Cancer Studies Used for Comparison with Young-Onset Bladder Cancer (YBC).

| Study         | Tumor stage                          | n   | Data type                                 |
|---------------|--------------------------------------|-----|-------------------------------------------|
| UROMOL study  | NMIBC ( $\leq$ T1)                   | 460 | RNA sequencing                            |
| Hurst et al   | NIBC (Ta)                            | 82  | WES (N = 24) + Target sequencing (N = 58) |
| TCGA          | MIBC ( $\geq$ Stage II)              | 408 |                                           |
| Pietzak et al | NIBC (Ta)                            | 55  | Target sequencing                         |
| CCGC study    | NMIBC (n = 18) + MIBC (n = 24)       | 42  | RNA sequencing                            |
| Ross et al    | Metastatic bladder cancer (Stage IV) | 35  | Target sequencing                         |

WES, whole exome sequencing.
